# Supplementary material
Source: publisher site journal article supplement (https://www.dovepress.com/article/545116)
Supplement: Supplementary file 1 [file 545116%20Supplementary%20Material.docx]

**SUPPLEMENTARY INFORMATION**

**Synthesis of precursors and MSNs**

Scheme S1. Chemical structures of dopamine, L-DOPA, and carbidopa

**Characterization of the DSDAs of L-dopa:** N-Oleoyl-L-Dopa (L-dopa-C18)


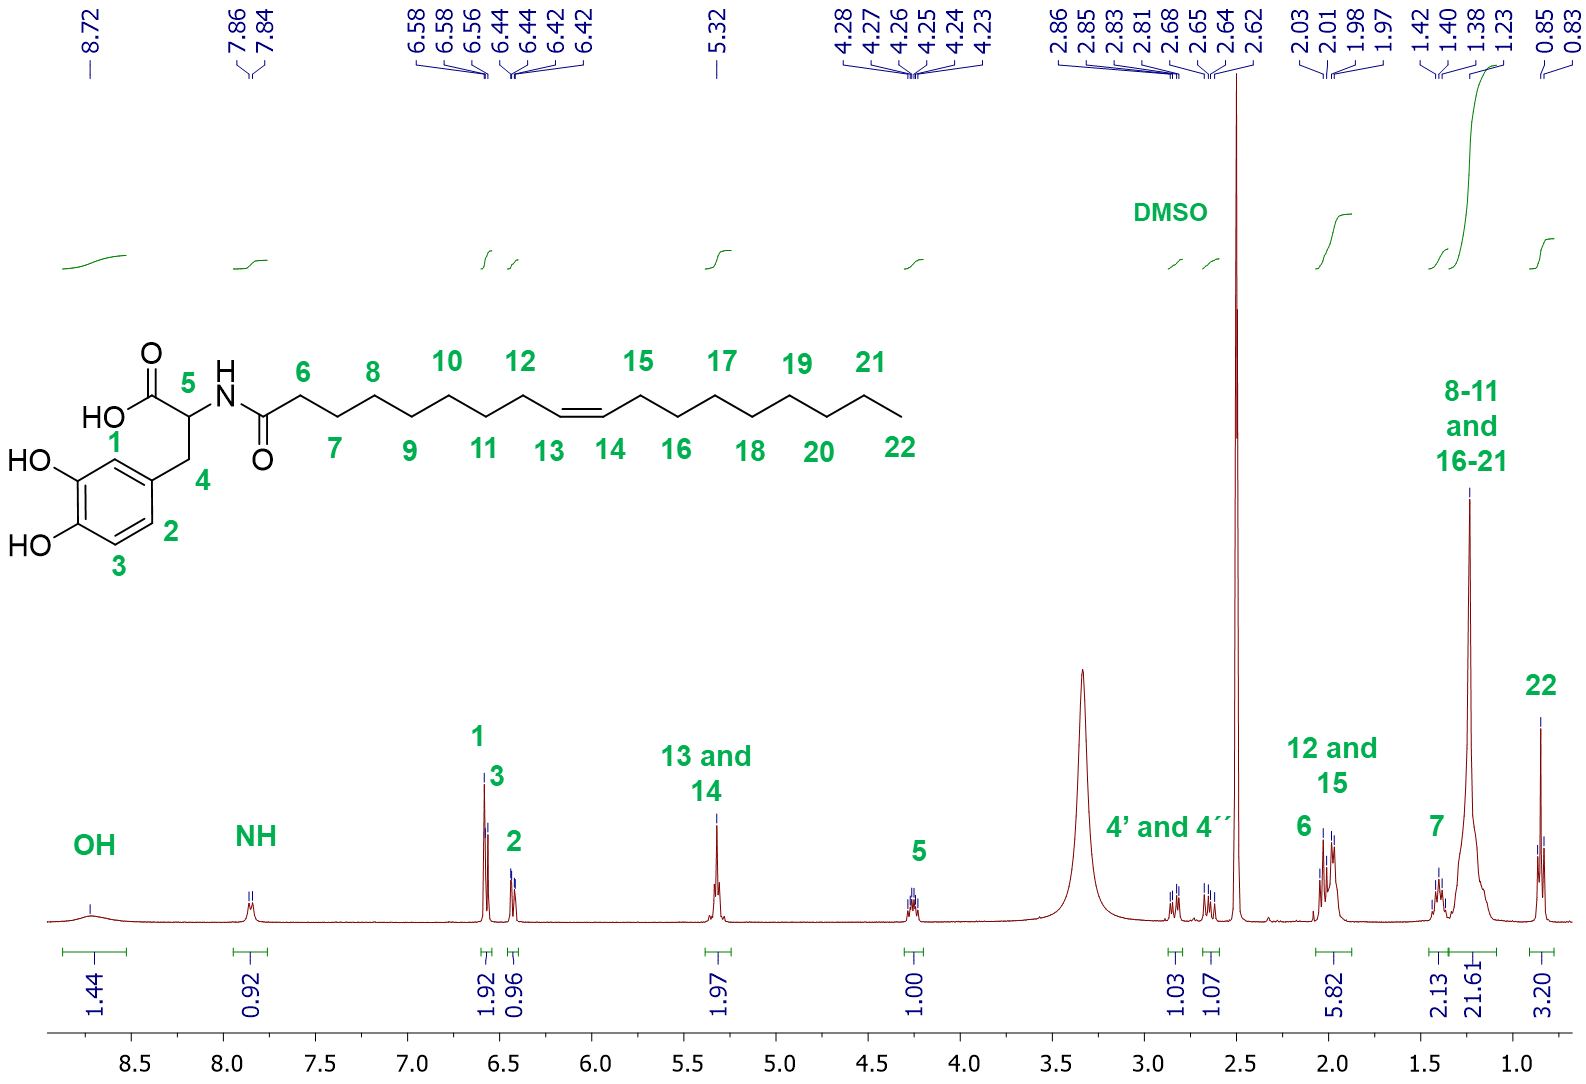


**Figure S1**. 1H NMR of DSDA of L-dopa-C18.

**1H-NMR (400 MHz, d6-DMSO), *δ*** (ppm): 8.70 (s.a., 2H, OH), 7.88 (d, *J* = 7.8 Hz, 1 H, NH), 6.58 (d, *J* = 2.2 Hz, 1H, CH-1), 6.57 (d, *J* = 7.8 Hz, 1H, CH-3), 6.43 (dd, *J* =8 Hz, *J* =1.88 Hz, 1H, CH-2), 5.32 (t, *J* = 5.44 Hz, 2H, CH-13 and 14), 4.30-4.24 (m, 1H, CH-5), 2.83 (dd, *J* = 13.8 Hz, *J* = 5 Hz, 1H, CH2-4), 2.64 (dd, *J*= 13.8 Hz, *J*= 5 Hz, 1H, CH2-4), 2.03 (t, *J* = 7.32 Hz, 2H, CH2-6), 1.97 (c, *J* =6 Hz, 4 H, CH2-12 and 15), 1.40 (q, J= 7.48 Hz, 2H, CH2-7), 1.23 (m, 20H, CH2 8-11/ 16-21), 0.85 (t, *J* = 6.68 Hz, 3H, CH2-22).


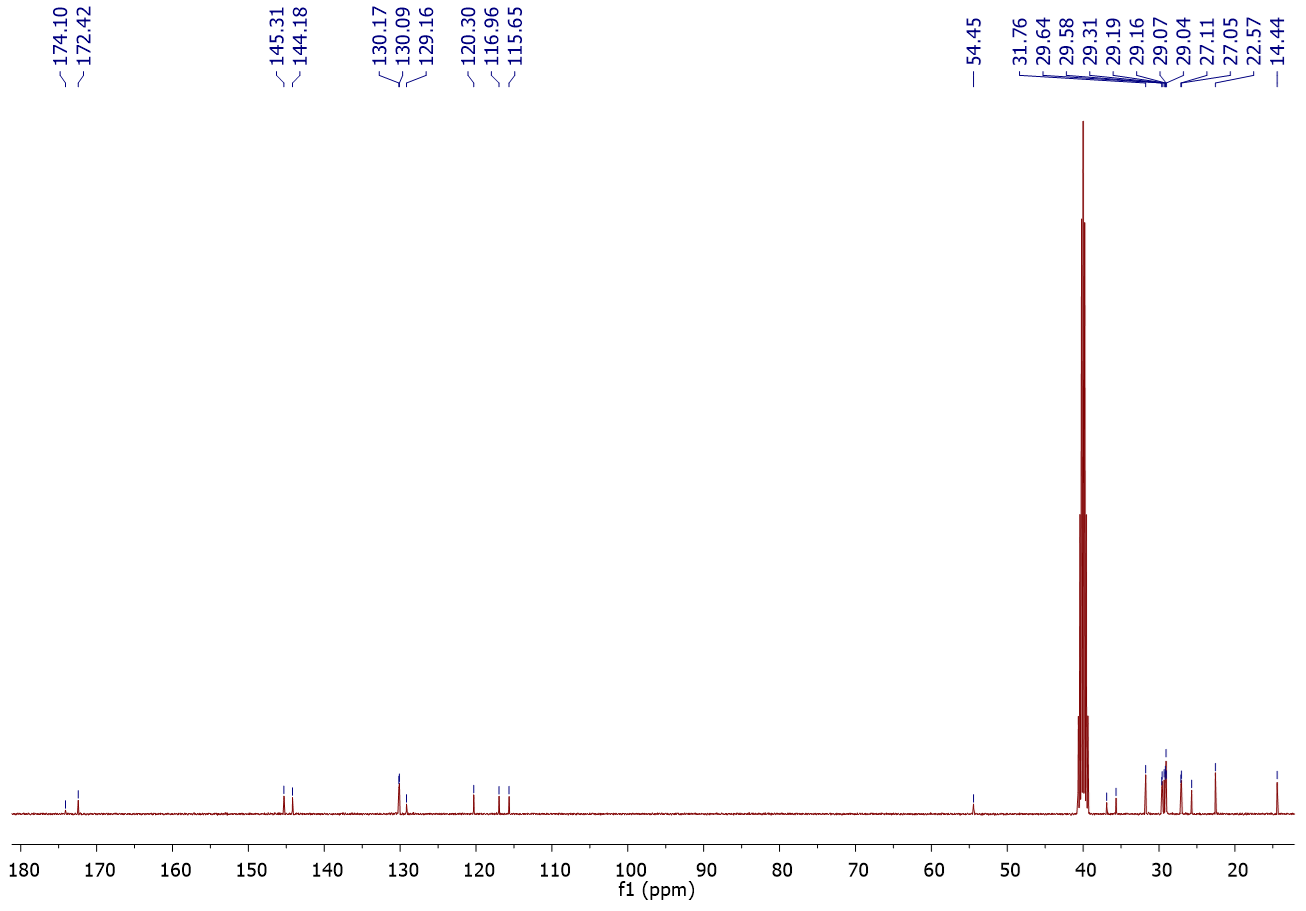


**Figure S2**. 13C NMR of L-dopa-C18 DSDA.

**13C-NMR (400 MHz, d6-DMSO), *δ* (ppm)**: 174.1 (N-C=O), 172.4 (O-C=O), 145.3 (C), 144.2 (C), 130.2 (C), 130.1 (CH), 129.1 (CH), 120.3 (CH), 116.9 (CH), 115.6 (CH), 54.4 (CH), 36.9 (CH2), 35.6 (CH2), 31.7 (CH2), 29.6 (CH2), 29.6 (CH2), 29.3 (CH2), 29.2 (CH2), 29.1 (CH2), 29.1 (CH2), 29.0 (CH2), 27.1 (CH2), 27.0 (CH2), 25.7 (CH2), 22.6 (CH2), 14.4 (CH3).


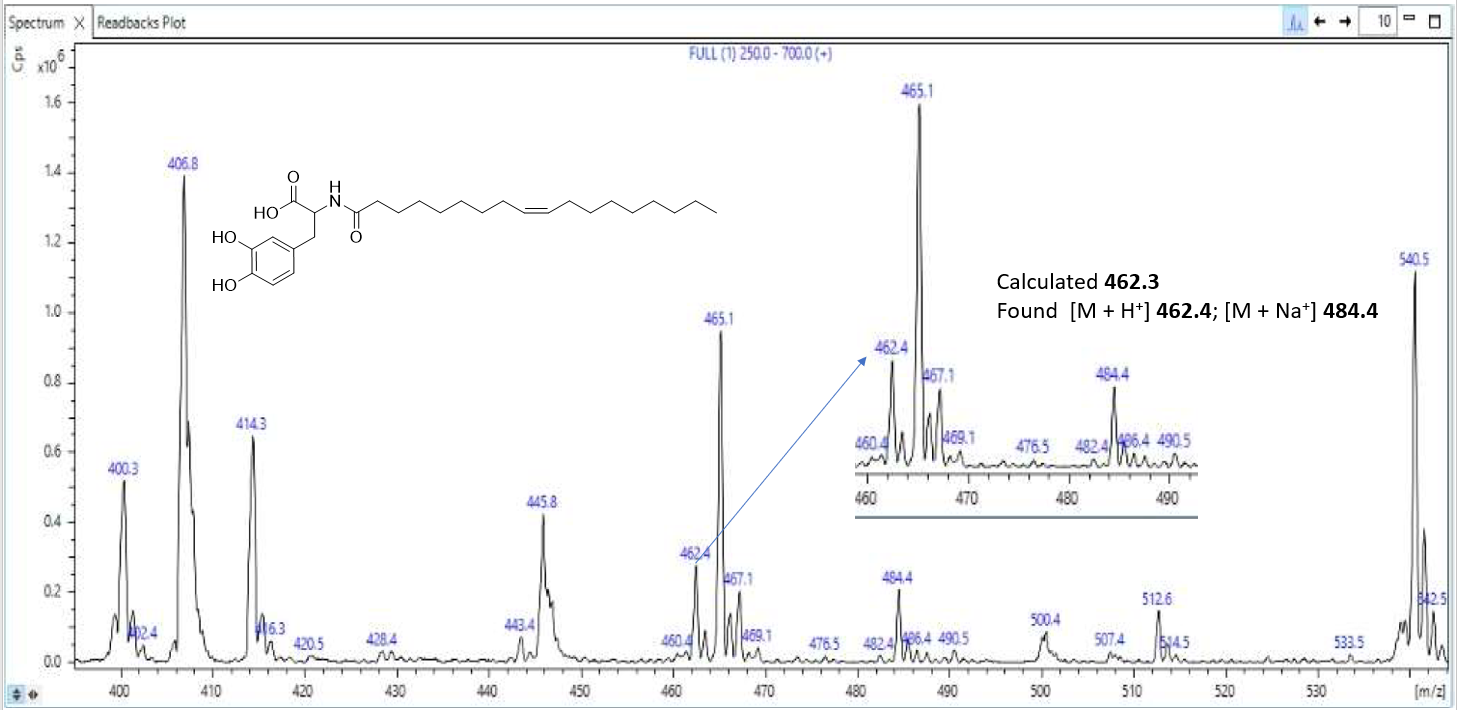


**Figure S3.** ESI Mass Spectrum of L-Dopa DSDA. Calculated for C27H43NO5 m/z=461.3. Found m/z= 462.4 (M+H+) and 484.4 (M+Na+).


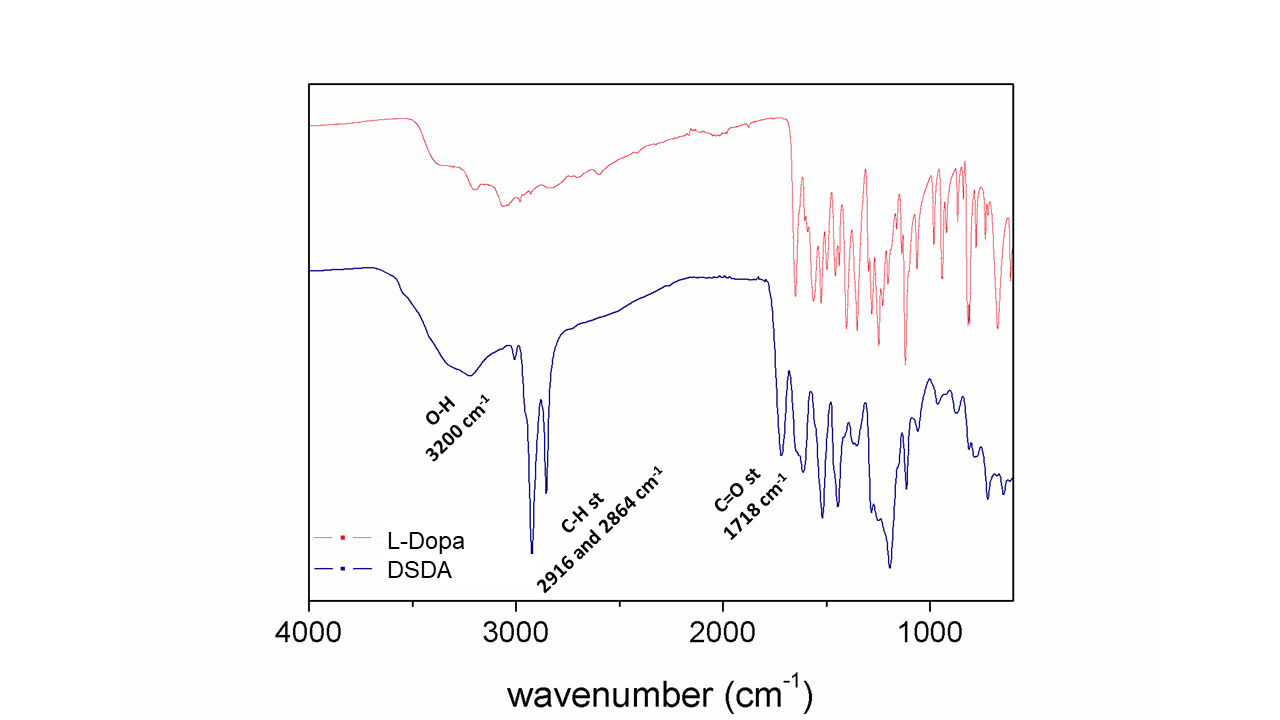


**Figure S4.** FTIR spectrum of DSDA of L-dopa-C18.

FTIR, ν: 3200 (br, OH), 2916, 2864 (C-H, st), 1718 (C=O, st) cm−1.

**Table S1**. EA of DSDA L-dopa-C18.

|  | **%N** | **%C** | **%H** |
| --- | --- | --- | --- |
| **Calculated** | 2.99 | 69.57 | 9.82 |
| **Found** | 3.13 | 69.77 | 9.23 |

**N-Decanoyl-L-Dopa (L-dopa-C10):**


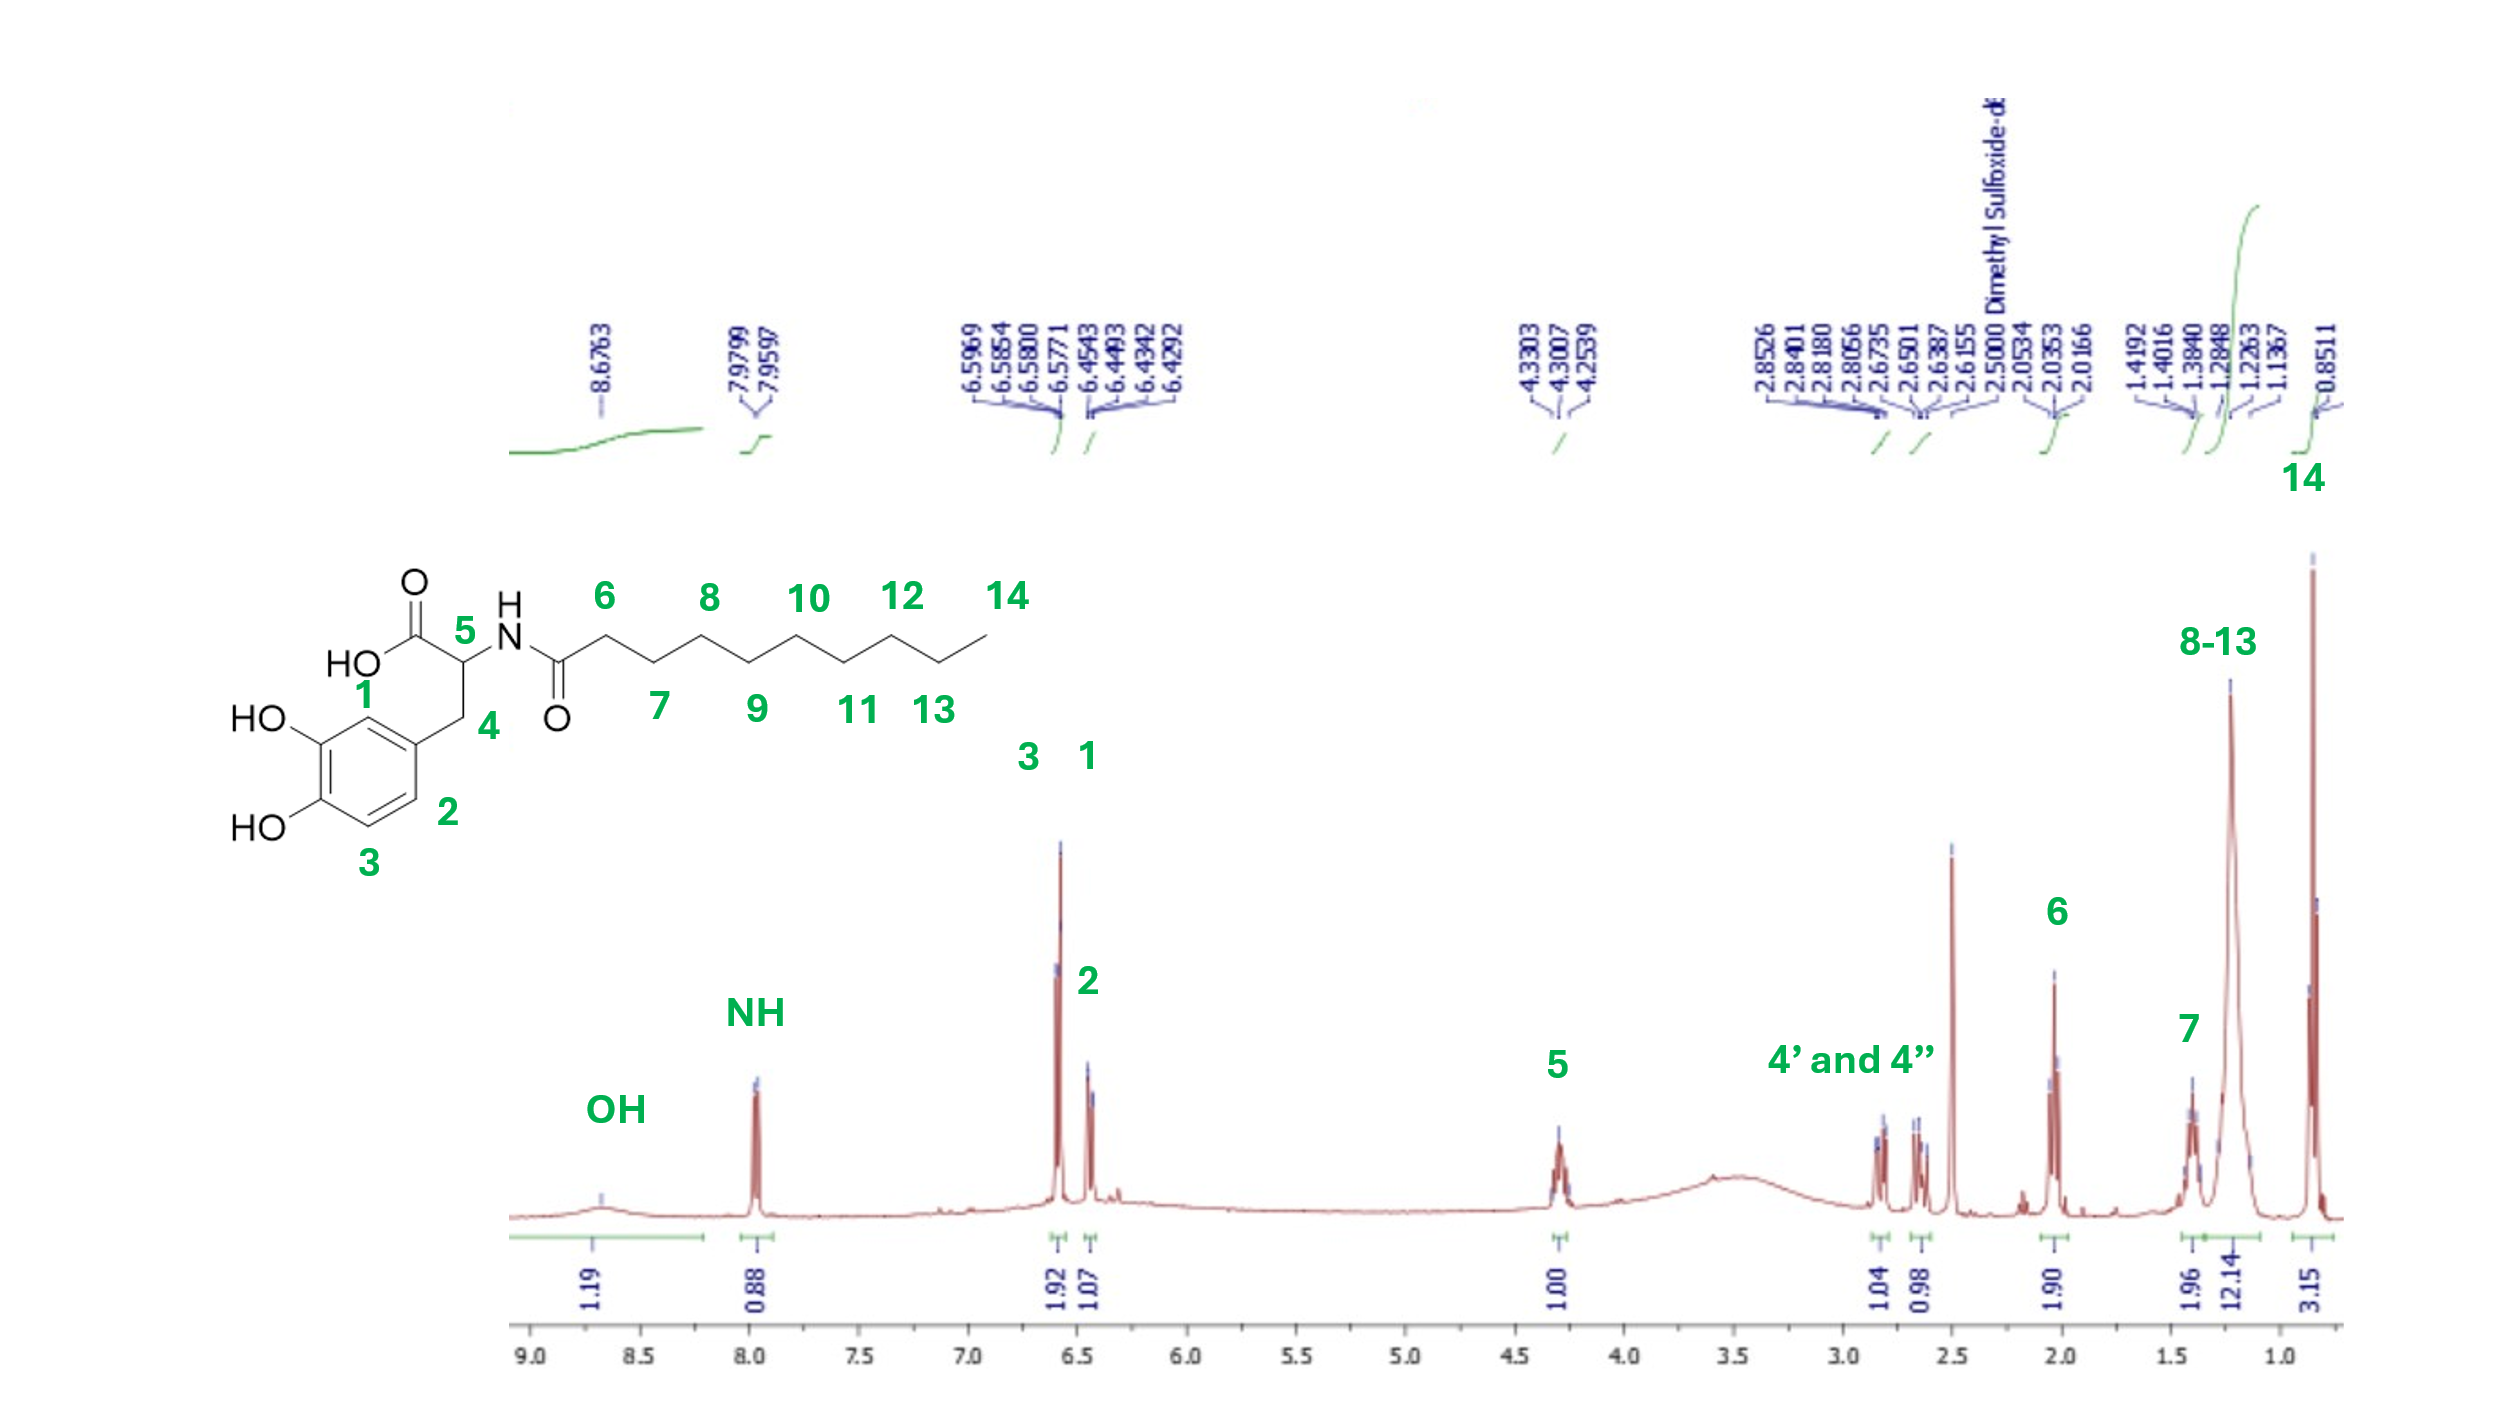


**Figure S5**. 1H NMR of DSDA of L-dopa-C10.

**1H-NMR (400 MHz, d6-DMSO), δ (ppm):** 8.70 (s.a., 2H, OH), 7.97 (d, *J* = 8.1 Hz, 1H, NH), 6.59 (d, *J* =6.8 , 1H, CH-3), 6.58 (d, *J* =3.3 Hz, 1H, CH-1), 6.44 (dd, *J* =8.0 Hz, *J* =2.0 Hz, 1H, CH-2), 4.33-4.25 (m, 1H, CH-5), 2.83 (dd, *J* = 13.8 Hz, *J* = 5 Hz, 1H, CH2-4), 2.64 (dd, *J*= 13.8 Hz, J= 5 Hz, 1H, CH2-4), 2.04 (t, *J* = 7.2 Hz, 2H, CH2-6), 1.40 (q, *J*= 7.2 Hz, 2H, CH2-7), 1.28-1.36 (m, 12H, CH2-8-13), 0.85 (t, *J* = 6.68 Hz, 3H, CH2-14).


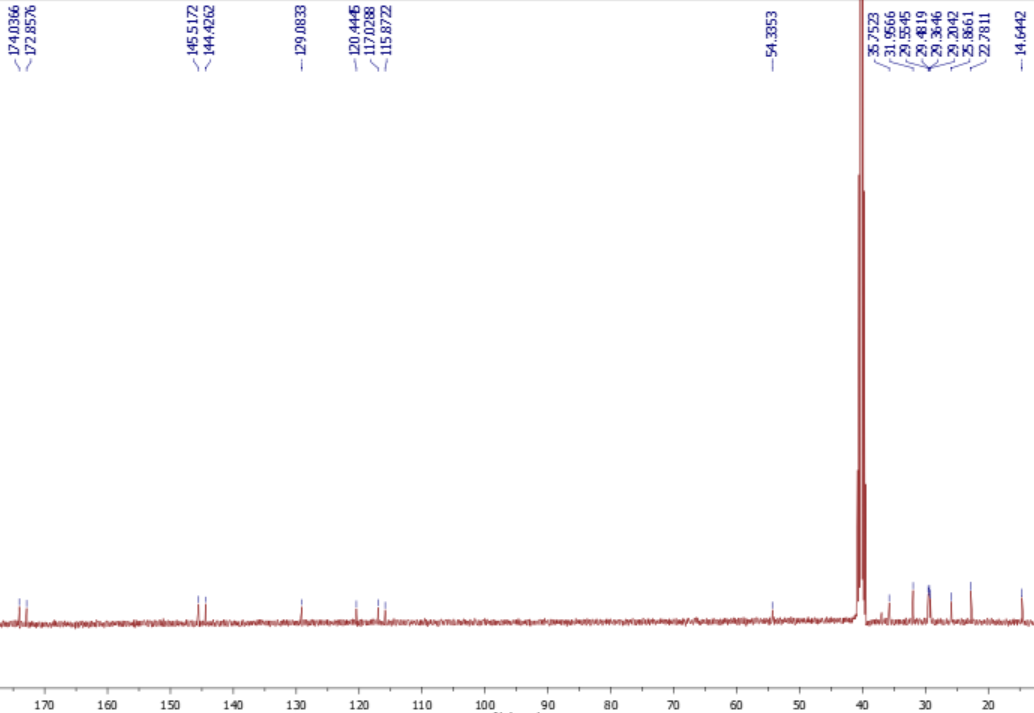


**Figure S6.** 13C NMR of DSDA of L-Dopa-C10.

**13C-NMR (400 MHz, d6-DMSO), *δ* (ppm)**: 174.0 (N-C=O), 172.9 (O-C=O), 145.5 (C), 144.4 (C), 129.1 (C), 120.4 (CH), 117.0 (CH), 115.9 (CH), 54.3 (CH), 35.7 (CH2), 32.0 (CH2), 29.5 (CH2), 29.5 (CH2), 29.4 (CH2), 29.2 (CH2), 25.9 (CH2), 22.8 (CH2), 14.6 (CH3).


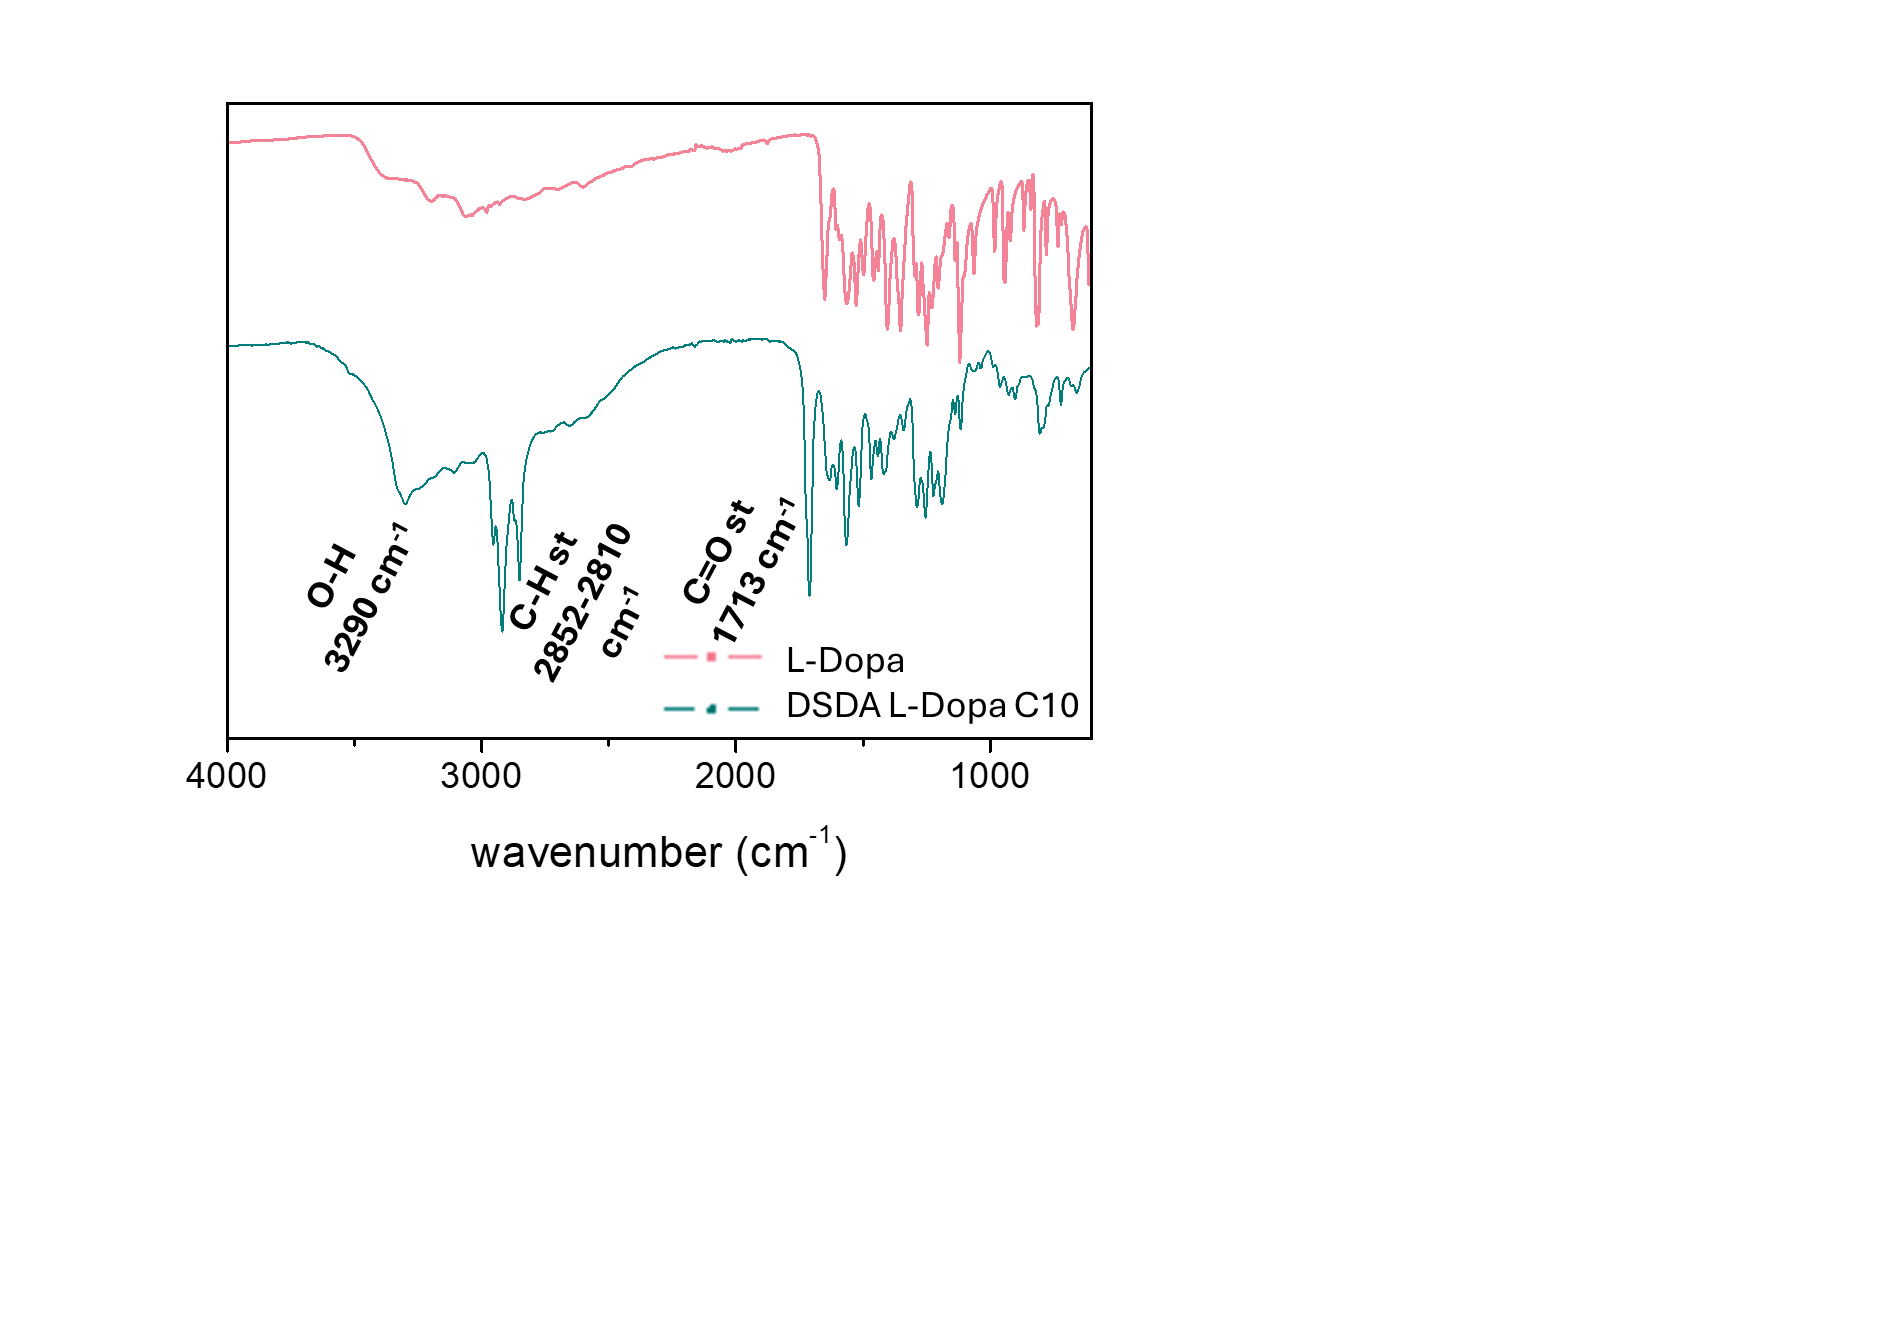


**Figure S7.** FTIR spectrum of DSDA of L-dopa-C10.

FTIR, ν: 3290 (br, OH), 2952, 2810 (C-H, st), 1713 (C=O, st) cm−1.

**Table S2.** PAMPA-BBB assay of L-dopa-C18.

|  | **Permeability Pe (10-6 cm s-1)** | **Classificationa** |
| --- | --- | --- |
| L-dopa | 0.94 ± 0.05 | CNS- |
| Oleic acid | 21.6 ± 0.23 | CNS+ |
| DSDA L-dopa-C10 | 0.27 ± 0.01 | CNS- |
| DSDA L-dopa-C18 | 1.13 ± 0.02 | CNS- |

a CNS+ (indicative of high BBB permeation): Pe (10-6 cm s-1) > 4.0; CNS+/-(discrete BBB permeation): Pe (10-6 cm s-1) from 4.0 to 2.0. CNS- (indicative of low BBB permeation): Pe (10-6 cm s-1) < 2.0. ND is not determined.

**Characterization of L-dopa@MSN**


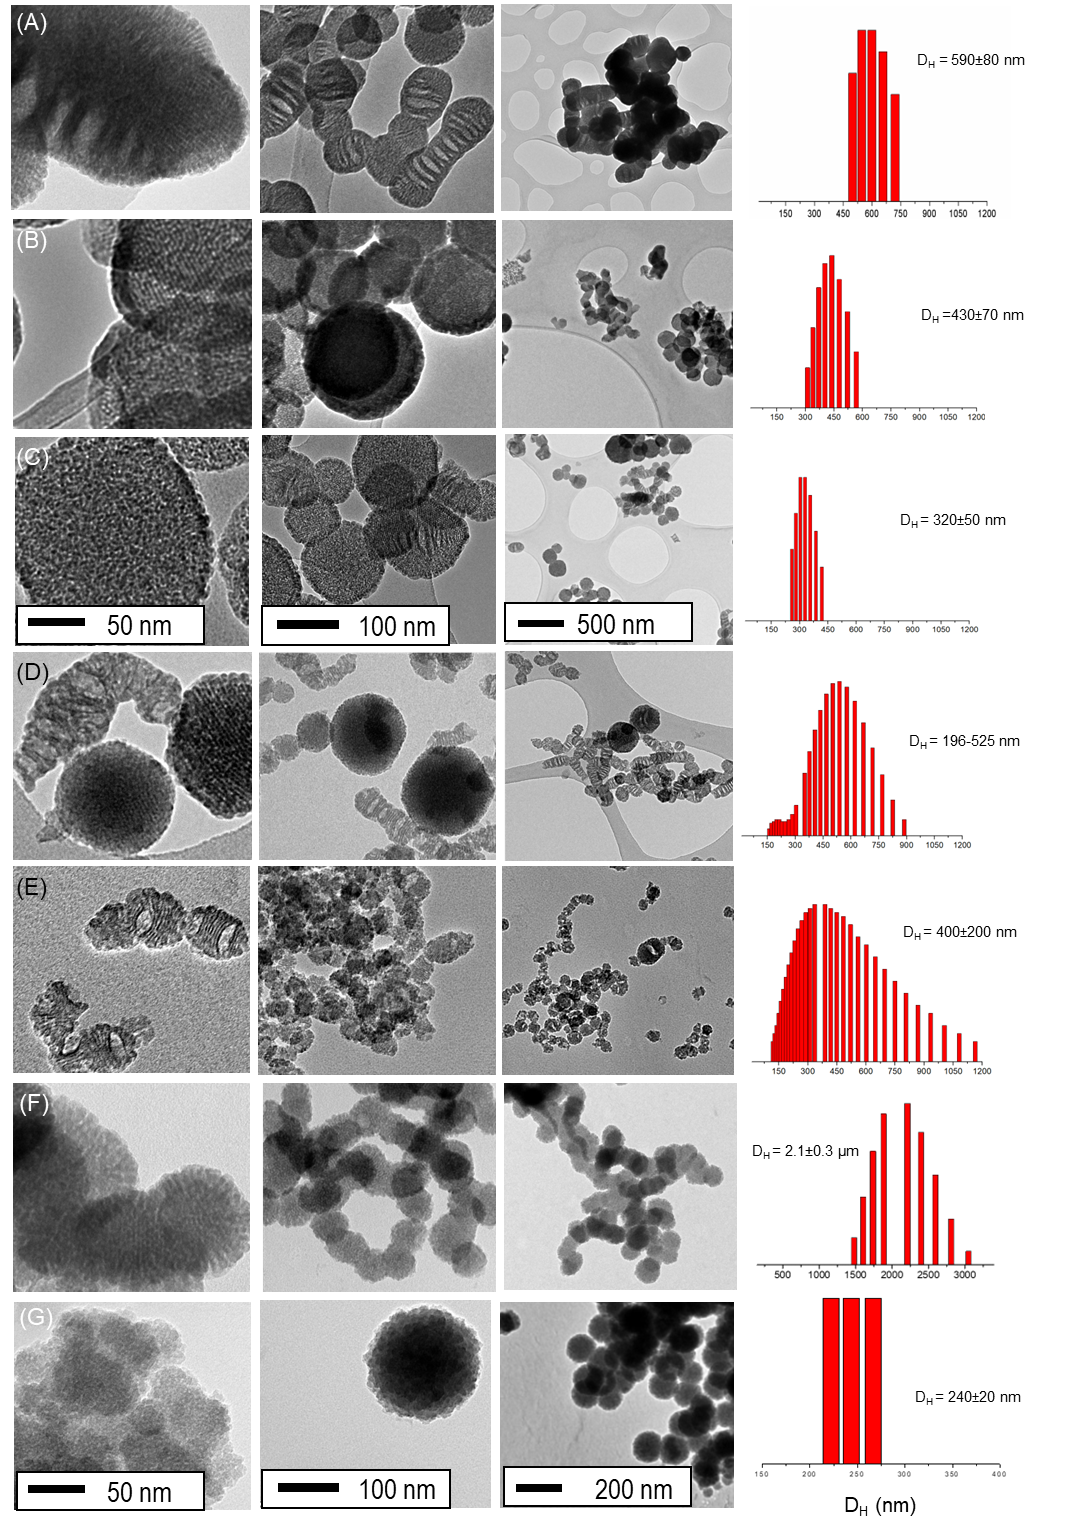


**Figure S8.** TEM images and DLS measurements of (A) L-dopa-C18@MSN-1, (B) L-dopa-C18@MSN-2, (C) L-dopa-C18@MSN-3, (D) L-dopa-C18@MSN-4, (E) L-dopa-C18@MSN-5, (F) L-dopa-C18@MSN-6 and (G) L-dopa-C10@MSN.


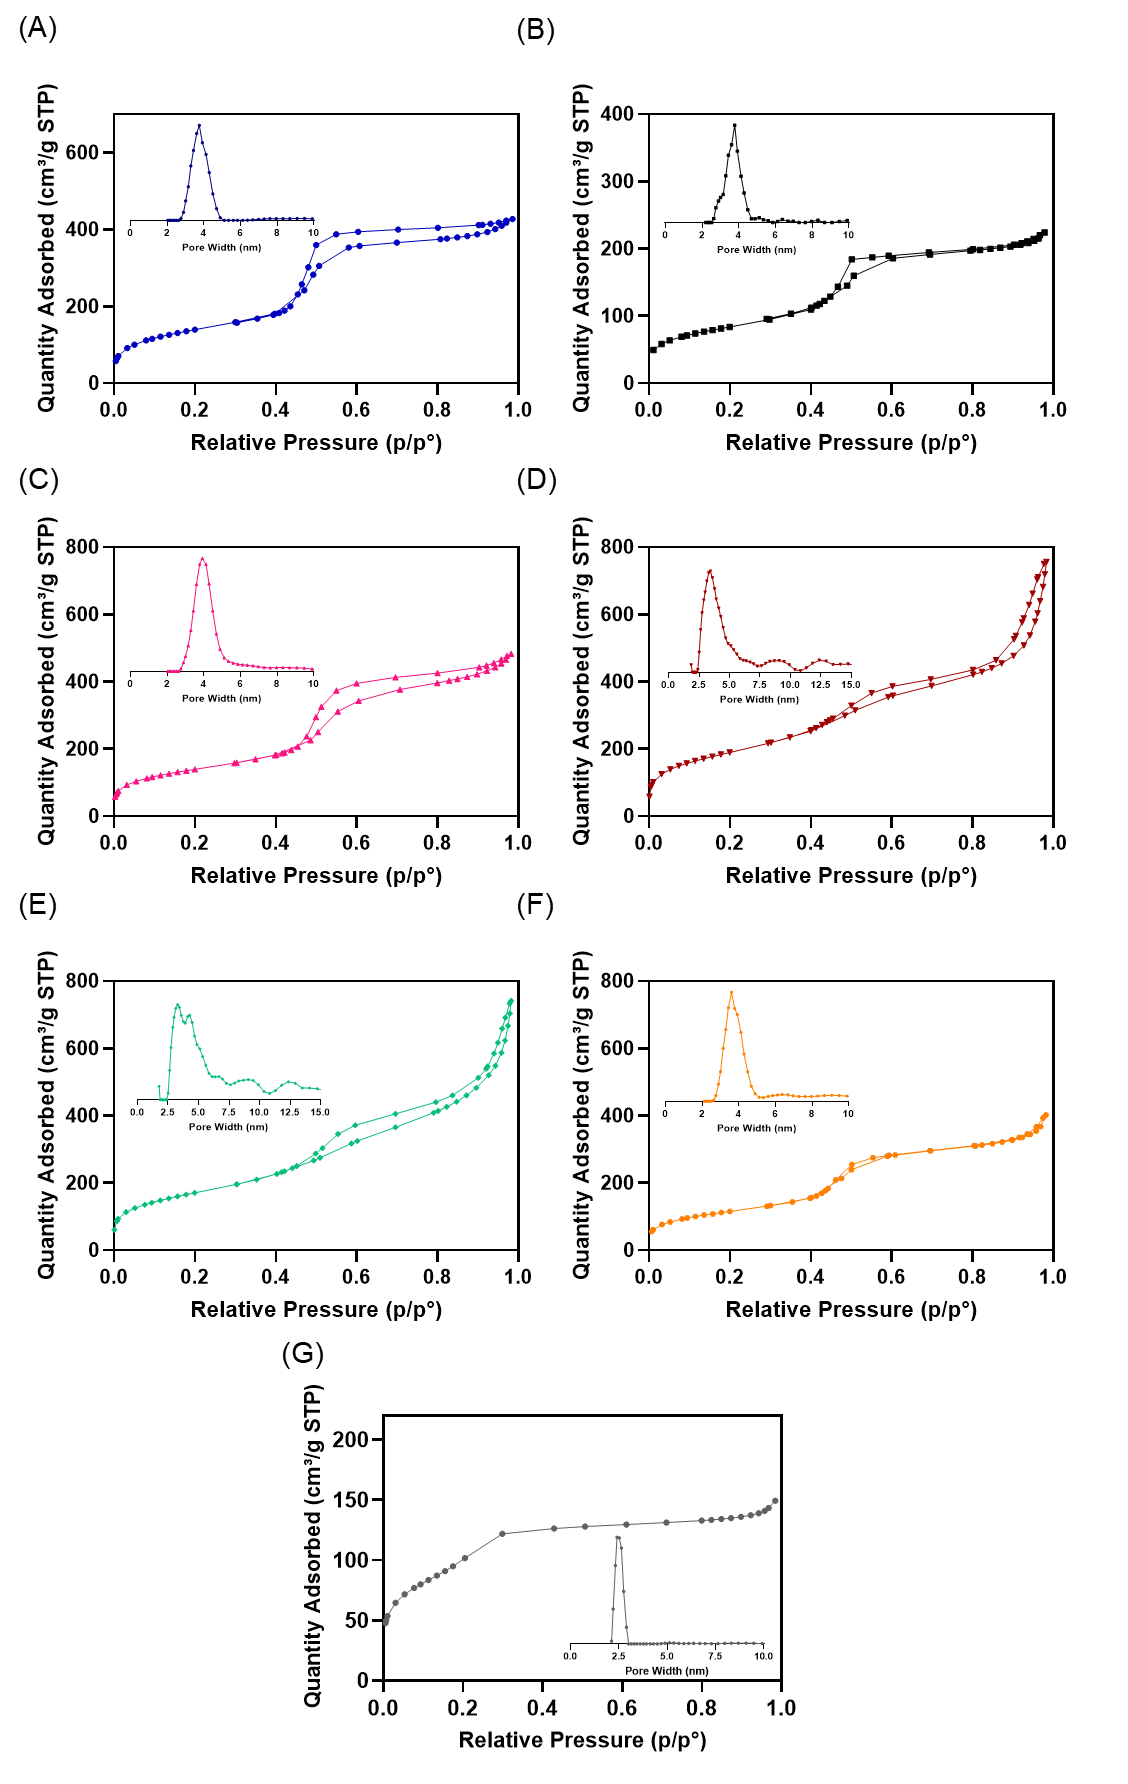


**Figure S9.** Adsorption N2 isotherms and pore distribution of (A) L-dopa-C18@MSN-1, (B) L-dopa-C18@MSN-2, (C) L-dopa-C18@MSN-3, (D) L-dopa-C18@MSN-4, (E) L-dopa-C18@MSN-5, (F) L-dopa-C18@MSN-6 and (G) L-dopa-C10@MSN.


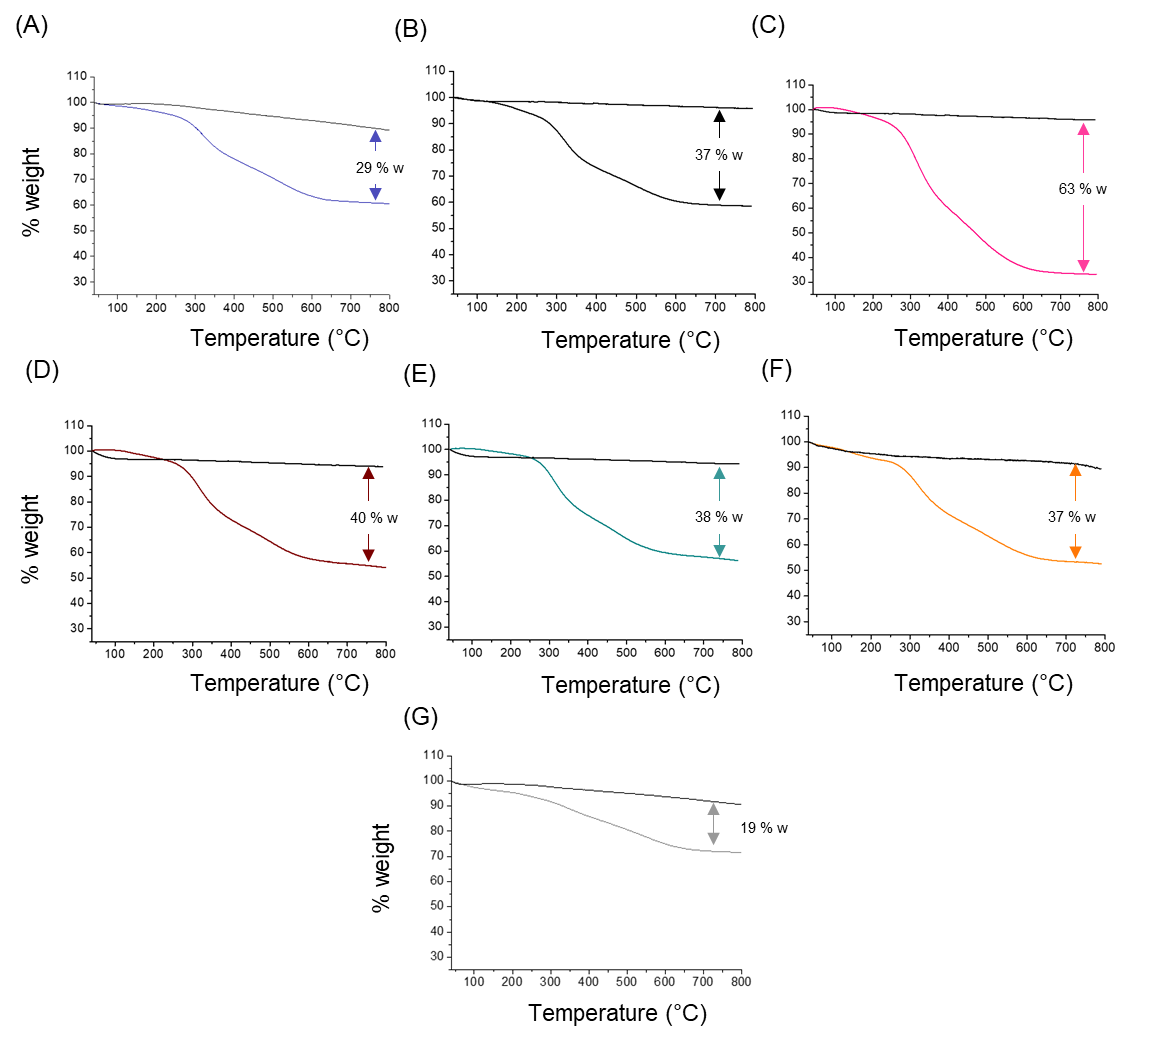


**Figure S10.** TGA of samples and calcinated samples (in black): (A) L-dopa-C18@MSN-1, (B) L-dopa-C18@MSN-2, (C) L-dopa-C18@MSN-3, (D) L-dopa-C18@MSN-4, (E) L-dopa-C18@MSN-5, (F) L-dopa-C18@MSN-6 and (G) L-dopa-C10@MSN.


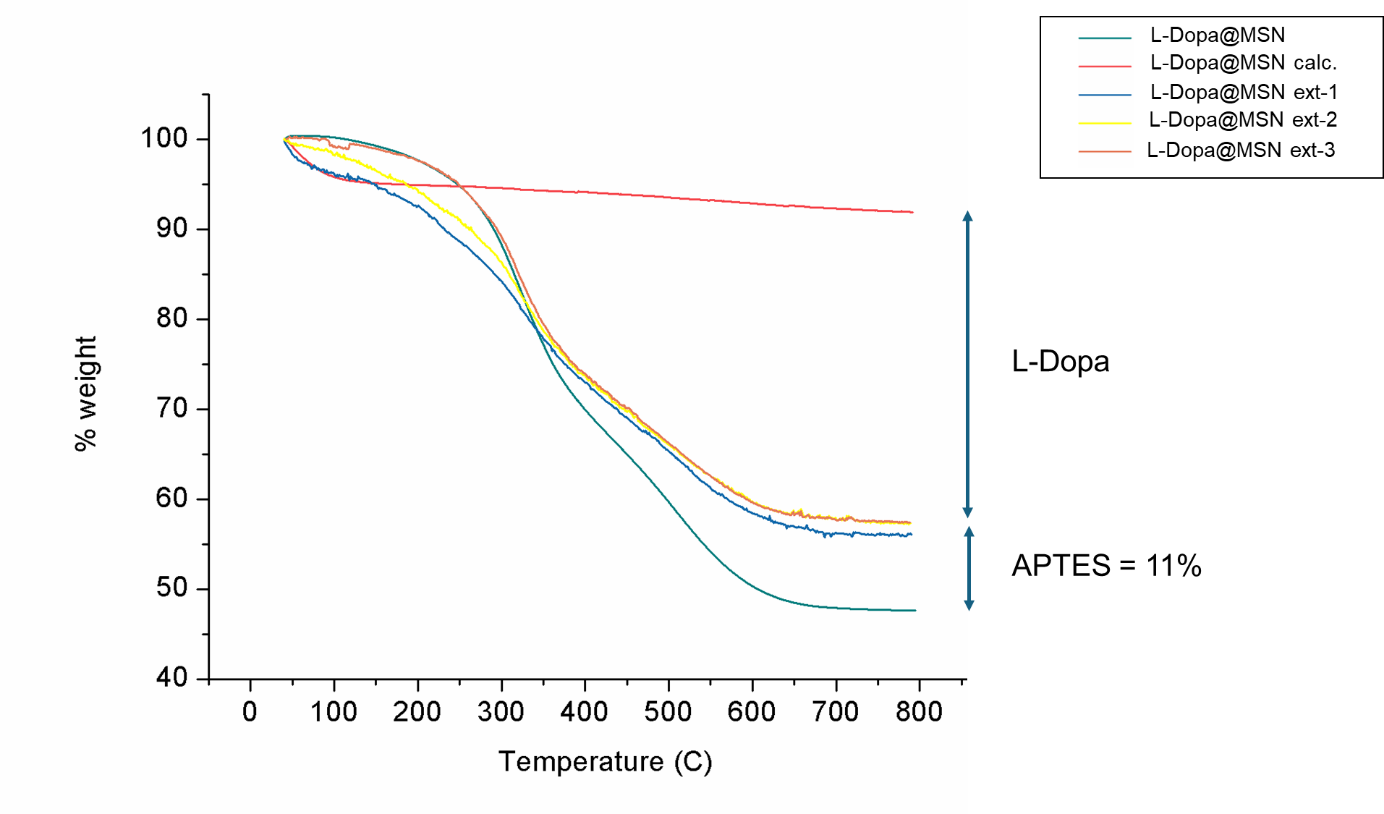


**Figure S11.** Thermogravimetric analysis of MSN-2 (as example) of the calcinated and extracted samples. Successive extractions of the samples with a mixture Ethanol/Hydrochloric acid were performed in order to remove completely L-dopa-C18. The weight loss observed in third extraction correspond uniquely to amount of APTES.

**
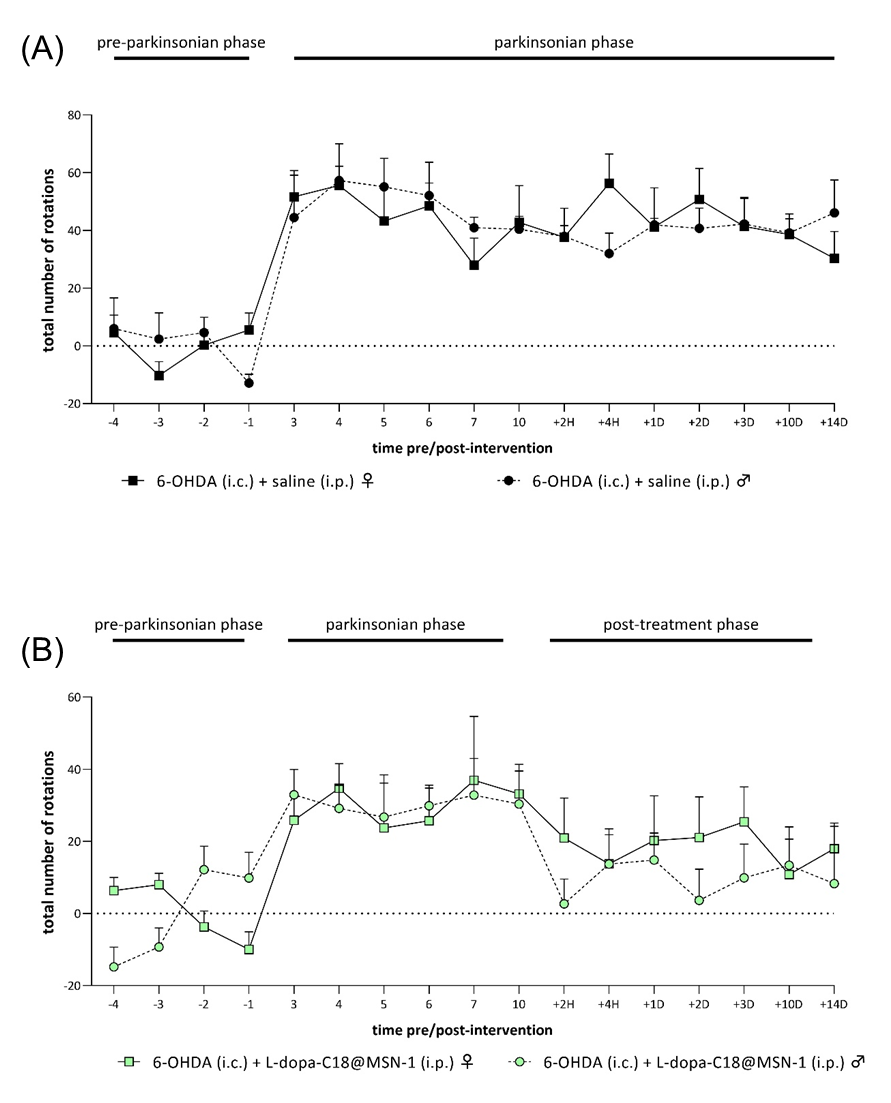
**

**Figure S12. (A)**Time course of 6-OHDA-injected female and of 6-OHDA-injected male mice. **(B)** Time course of 6-OHDA-injected female and of 6-OHDA-injected male mice treated with L-dopa-C18@MSN-1. Data are reported as total number of rotations made in the contraversive or ipsiversive direction in 15 min.


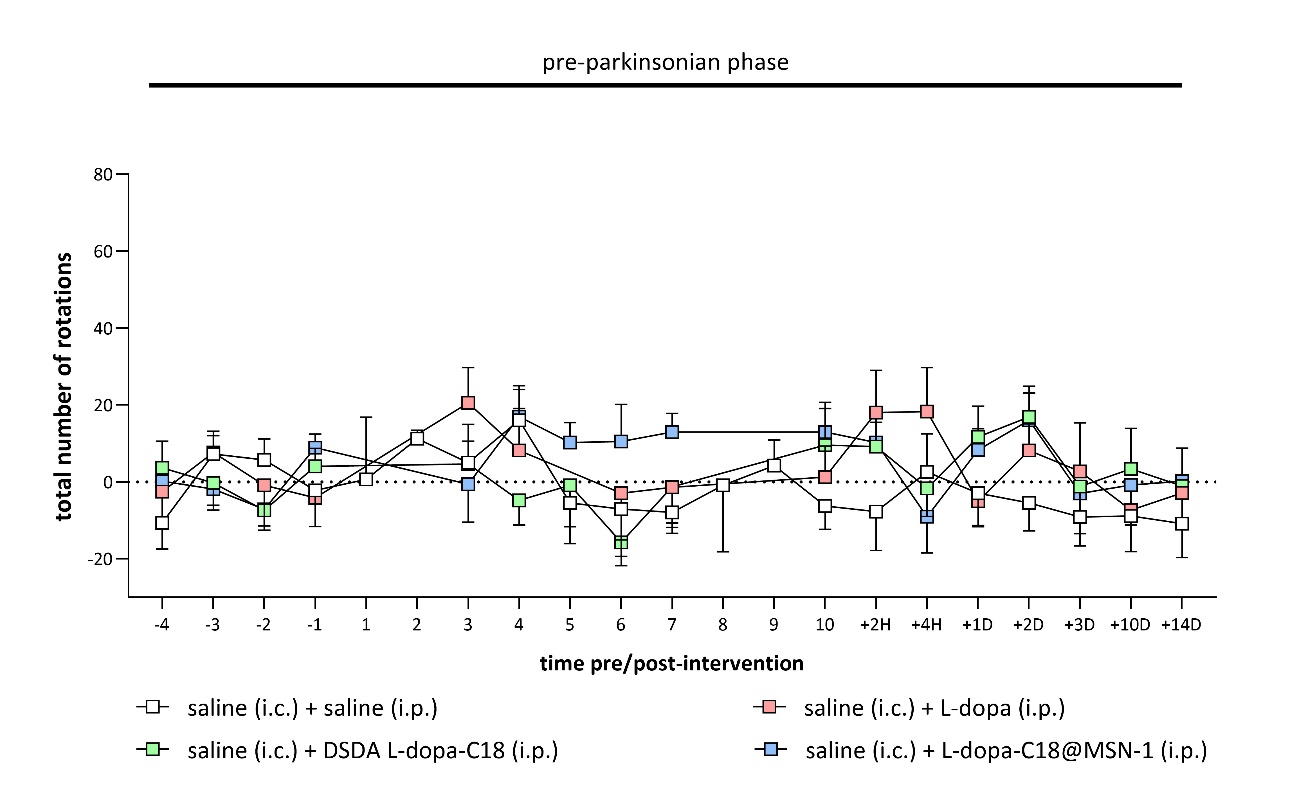


**Figure S13.** Time course of saline-injected mice treated groups. Data are reported as total number of rotations made in the contraversive or ipsiversive direction in 15 min.
